# Supplementary material
Source: publisher site journal article supplement (https://www.dovepress.com/article/555819)
Supplement: Supplementary file 1 [file Supplementary%20Material%201.docx]

**Supplementary Material 1**

**Detailed Search Strategies and Number of Records Retrieved per Database**

A comprehensive literature search was conducted on April 23, 2025, across PubMed (MEDLINE), Embase, and Web of Science. The search was limited to studies published between January 2010 and April 2025 to reflect the clinical adoption timeline of immune checkpoint inhibitors (ICIs).

**1. PubMed (MEDLINE)**

**Search strategy**

(("immune checkpoint inhibitors"[MeSH Terms] OR "immune checkpoint inhibitor"[All Fields] OR PD-1[All Fields] OR PD-L1[All Fields] OR CTLA-4[All Fields])

AND

("colitis"[MeSH Terms] OR "immune-mediated diarrhea"[All Fields] OR "immune-related colitis"[All Fields] OR IMDC[All Fields])

AND

("C-reactive protein"[MeSH Terms] OR CRP[All Fields] OR "biomarker"[All Fields]))

AND

("2010/01/01"[Date - Publication] : "2025/04/30"[Date - Publication])

**Number of records retrieved:** **167**

**2. Embase**

**Search strategy**

('immune checkpoint inhibitor'/exp OR 'immune checkpoint inhibitor':ti,ab OR PD-1:ti,ab OR PD-L1:ti,ab OR CTLA-4:ti,ab)

AND

('colitis'/exp OR 'immune mediated diarrhea':ti,ab OR 'immune related colitis':ti,ab OR IMDC:ti,ab)

AND

('c reactive protein'/exp OR 'c reactive protein':ti,ab OR CRP:ti,ab OR biomarker:ti,ab)

AND

[2010-2025]/py

**Number of records retrieved:** **205**

**3. Web of Science**

**Search strategy**

TS=("immune checkpoint inhibitor*" OR PD-1 OR PD-L1 OR CTLA-4)

AND

TS=("colitis" OR "immune-mediated diarrhea" OR "immune-related colitis" OR IMDC)

AND

TS=("C-reactive protein" OR CRP OR biomarker)

Timespan: 2010-2025.

Indexes: SCI-EXPANDED, SSCI.

**Number of records retrieved:** **166**

**Total Records**

- PubMed: **167**
- Embase: **205**
- Web of Science: **166**

**Total retrieved before deduplication: 538 records**
After removing **129 duplicates**, **409 unique records** remained for title and abstract screening.

**Manual Screening**

Reference lists of included studies and relevant review articles were manually screened, but **no additional eligible studies** were identified.
